# Supplementary material for: The prevalence and long-term variation of hospital readmission for patients with diabetes in Tianjin, China: A cross-sectional study
Source: PubMed Central journal article supplement (PMC5662355; doi:10.1097/md.0000000000007953), 2017-10-20
Supplement: medi-96-e7953-s001.pdf [file medi-96-e7953-s001.pdf]

**The prevalence and long-term variation of hospital readmission for patients with diabetes in Tianjin, China: a cross-sectional study**

Xiaoqian Liu

**Table S1 The predicted accuracy of baseline model**

| Years  | Baseline Model     | p      |
|--------|--------------------|--------|
| 30-day |                    |        |
| 2008   | 0.745(0.720-0.765) | <0.001 |
| 2009   | 0.777(0.721-0.792) | <0.001 |
| 2010   | 0.791(0.776-0.810) | 0.021  |
| 2011   | 0.801(0.782-0.824) | <0.001 |
| 2012   | 0.824(0.806-0.846) | <0.001 |
| 2013   | 0.840(0.828-0.869) | <0.001 |
| 60-day |                    |        |
| 2008   | 0.650(0.613-0.660) | <0.001 |
| 2009   | 0.663(0.610-0.681) | 0.031  |
| 2010   | 0.652(0.622-0.674) | 0.045  |
| 2011   | 0.705(0.688-0.725) | <0.001 |
| 2012   | 0.716(0.700-0.745) | 0.041  |
| 2013   | 0.725(0.711-0.738) | 0.049  |
| 90-day |                    |        |
| 2008   | 0.621(0.609-0.633) | 0.021  |
| 2009   | 0.614(0.601-0.625) | 0.022  |
| 2010   | 0.625(0.621-0.640) | 0.029  |
| 2011   | 0.662(0.650-0.677) | 0.049  |
| 2012   | 0.734(0.720-0.750) | <0.001 |
| 2013   | 0.764(0.753-0.780) | <0.001 |

**The prevalence and long-term variation of hospital readmission for patients with diabetes in Tianjin, China: a cross-sectional study**

Xiaoqian Liu

**Table S2 The readmission ratios at different time intervals (N(%))**

| Years | 30-day    | 60-day   | 90-day    | p      |
|-------|-----------|----------|-----------|--------|
| 2008  | 351(4.2)  | 336(4.1) | 756(9.2)  | <0.001 |
| 2009  | 462(4.2)  | 380(3.5) | 1006(9.2) | <0.001 |
| 2010  | 399 (3.4) | 377(3.2) | 1079(9.2) | <0.001 |
| 2011  | 383(2.9)  | 377(2.8) | 1207(9.1) | <0.001 |
| 2012  | 377(2.7)  | 348(2.5) | 1151(8.3) | <0.001 |
| 2013  | 366(2.4)  | 326(2.2) | 1263(8.4) | <0.001 |

## The prevalence and long-term variation of hospital readmission for patients with diabetes in Tianjin, China: a cross-sectional study

Xiaoqian Liu

**Table S3 Characteristics of patients and hospitals of discharge for 30-day readmission**

| Variables                             | Coefficient | SE*      | p        |
|---------------------------------------|-------------|----------|----------|
| 2008                                  |             |          |          |
| Secondary hospitals                   | -0.093446   | 0.212984 | 0.6608   |
| Tertiary hospitals                    | -0.129518   | 0.205322 | 0.5282   |
| Male                                  | -0.290104   | 0.117574 | 0.0136   |
| Age                                   | 0.013065    | 0.006440 | 0.0425   |
| Previously diagnosed diabetes         | -0.100623   | 0.167697 | 0.5485   |
| Suffered with diabetes complications  | 0.317020    | 0.125747 | 0.0117   |
| Have family history of diabetes       | -0.383504   | 0.368326 | 0.2978   |
| Screening one year prior to diagnosis | -0.152521   | 0.394164 | 0.6988   |
| Type II diabetes                      | -1.099421   | 0.214578 | <0.001   |
| Length of stay                        | 0.030938    | 0.004595 | <0.001   |
| Suffered with hypertension            | 0.148921    | 0.169861 | 0.3806   |
| Reimbursement ratio: 85%              | -0.478031   | 0.200211 | 0.0170   |
| Suffered with CHF                     | 0.319107    | 0.308859 | 0.3015   |
| 2009                                  |             |          |          |
| Secondary hospitals                   | 0.312419    | 0.194156 | 0.107593 |
| Tertiary hospitals                    | 0.020329    | 0.193495 | 0.916327 |
| Male                                  | -0.220907   | 0.103184 | 0.032282 |
| Age                                   | 0.021049    | 0.005608 | 0.000175 |
| Previously diagnosed diabetes         | 0.230096    | 0.129671 | 0.075988 |
| Suffered with diabetes complications  | 0.262051    | 0.113913 | 0.021423 |
| Have family history of diabetes       | -0.051079   | 0.281579 | 0.856052 |
| Screening one year prior to diagnosis | 0.208136    | 0.337106 | 0.536958 |
| Type II diabetes                      | -1.265158   | 0.209703 | <0.001   |
| Length of stay                        | 0.030510    | 0.004747 | <0.001   |
| Suffered with hypertension            | 0.274697    | 0.137944 | 0.046440 |
| Reimbursement ratio: 85%              | -0.168706   | 0.168460 | 0.316602 |
| Suffered with CHF                     | 0.034517    | 0.305972 | 0.910179 |
| 2010                                  |             |          |          |
| Secondary hospitals                   | 0.503541    | 0.203540 | 0.013364 |
| Tertiary hospitals                    | 0.382961    | 0.201954 | 0.057923 |
| Male                                  | -0.006908   | 0.110168 | 0.950003 |
| Age                                   | 0.019961    | 0.006121 | 0.001109 |
| Previously diagnosed diabetes         | 0.115992    | 0.134161 | 0.387273 |
| Suffered with diabetes complications  | 0.442762    | 0.116913 | <0.001   |
| Have family history of diabetes       | 0.016102    | 0.285786 | 0.955069 |
| Screening one year prior to diagnosis | -0.905939   | 0.588667 | 0.123812 |

|      | Variables                             | Coefficient | SE*      | p        |
|------|---------------------------------------|-------------|----------|----------|
|      | Type II diabetes                      | -1.457054   | 0.225064 | <0.001   |
|      | Length of stay                        | 0.037922    | 0.005721 | <0.001   |
|      | Suffered with hypertension            | 0.273095    | 0.138599 | 0.048792 |
|      | Reimbursement ratio: 85%              | -0.354435   | 0.184261 | 0.054410 |
|      | Suffered with CHF                     | 0.073628    | 0.278752 | 0.791677 |
| 2011 |                                       |             |          |          |
|      | Secondary hospitals                   | 0.398320    | 0.189377 | 0.03544  |
|      | Tertiary hospitals                    | 0.277736    | 0.186682 | 0.13682  |
|      | Male                                  | 0.074112    | 0.112276 | 0.50919  |
|      | Age                                   | 0.024464    | 0.006227 | <0.001   |
|      | Previously diagnosed diabetes         | 0.128643    | 0.136329 | 0.34536  |
|      | Suffered with diabetes complications  | 0.632205    | 0.115639 | <0.001   |
|      | Have family history of diabetes       | -0.591591   | 0.394458 | 0.13368  |
|      | Screening one year prior to diagnosis | -0.125327   | 0.427643 | 0.76947  |
|      | Type II diabetes                      | -0.789914   | 0.271689 | 0.00364  |
|      | Length of stay                        | 0.047622    | 0.006483 | <0.001   |
|      | Suffered with hypertension            | 0.130509    | 0.112059 | 0.24416  |
|      | Reimbursement ratio: 85%              | -0.278470   | 0.186850 | 0.13614  |
|      | Suffered with CHF                     | 0.438939    | 0.353814 | 0.21476  |
| 2012 |                                       |             |          |          |
|      | Secondary hospitals                   | 0.403348    | 0.208781 | 0.05337  |
|      | Tertiary hospitals                    | 0.497408    | 0.203859 | 0.01469  |
|      | Male                                  | -0.282437   | 0.113668 | 0.01296  |
|      | Age                                   | 0.017760    | 0.006299 | 0.00481  |
|      | Previously diagnosed diabetes         | -0.031845   | 0.143411 | 0.82427  |
|      | Suffered with diabetes complications  | 0.700378    | 0.115101 | <0.001   |
|      | Have family history of diabetes       | 0.065774    | 0.331935 | 0.84293  |
|      | Screening one year prior to diagnosis | -0.451951   | 0.458798 | 0.32459  |
|      | Type II diabetes                      | -0.682934   | 0.278876 | 0.01433  |
|      | Length of stay                        | 0.047919    | 0.005900 | <0.001   |
|      | Suffered with hypertension            | 0.242245    | 0.140677 | 0.08507  |
|      | Reimbursement ratio: 85%              | -0.357425   | 0.181781 | 0.04927  |
|      | Suffered with CHF                     | -0.828819   | 1.015789 | 0.41454  |
| 2013 |                                       |             |          |          |
|      | Secondary hospitals                   | 0.141419    | 0.213215 | 0.5072   |
|      | Tertiary hospitals                    | 0.155846    | 0.207551 | 0.4527   |
|      | Male                                  | -0.128949   | 0.115244 | 0.2632   |
|      | Age                                   | 0.029957    | 0.006351 | <0.001   |
|      | Previously diagnosed diabetes         | -0.065721   | 0.144190 | 0.6485   |
|      | Suffered with diabetes complications  | 0.500157    | 0.117597 | <0.001   |
|      | Have family history of diabetes       | -0.249598   | 0.352396 | 0.4788   |
|      | Screening one year prior to diagnosis | -0.507465   | 0.469603 | 0.2799   |
|      | Type II diabetes                      | -1.267998   | 0.248134 | <0.001   |

| Variables                  | Coefficient | SE*      | p      |
|----------------------------|-------------|----------|--------|
| Length of stay             | 0.049112    | 0.006399 | <0.001 |
| Suffered with hypertension | 0.292117    | 0.142999 | 0.0411 |
| Reimbursement ratio: 85%   | -0.108617   | 0.183931 | 0.5548 |
| Suffered with CHF          | 0.194042    | 0.601983 | 0.7472 |

\*SE: Standard error

## The prevalence and long-term variation of hospital readmission for patients with diabetes in Tianjin, China: a cross-sectional study

Xiaoqian Liu

**Table S4 Characteristics of patients and hospitals of discharge for 60-day readmission**

|      | Variables                             | Coefficient | SE*      | p       |
|------|---------------------------------------|-------------|----------|---------|
| 2008 | Secondary hospitals                   | 0.083475    | 0.197388 | 0.67237 |
|      | Tertiary hospitals                    | -0.595213   | 0.199823 | 0.00289 |
|      | Male                                  | -0.03191    | 0.118964 | 0.78852 |
|      | Age                                   | 0.007337    | 0.006504 | 0.25924 |
|      | Previously diagnosed diabetes         | 0.114015    | 0.159732 | 0.47536 |
|      | Suffered with diabetes complications  | -0.002767   | 0.132152 | 0.98330 |
|      | Have family history of diabetes       | -0.283236   | 0.368260 | 0.44182 |
|      | Screening one year prior to diagnosis | -0.667854   | 0.512344 | 0.19239 |
|      | Type II diabetes                      | 0.154534    | 0.349792 | 0.65864 |
|      | Length of stay                        | 0.014837    | 0.006196 | 0.01664 |
|      | Suffered with hypertension            | -0.024738   | 0.178430 | 0.88973 |
|      | Reimbursement ratio: 85%              | -0.384212   | 0.199367 | 0.05396 |
|      | Suffered with CHF                     | 0.746441    | 0.276291 | 0.00690 |
| 2009 | Secondary hospitals                   | -0.239652   | 0.176337 | 0.17413 |
|      | Tertiary hospitals                    | -0.569642   | 0.176213 | 0.00123 |
|      | Male                                  | -0.074018   | 0.111164 | 0.50551 |
|      | Age                                   | 0.018066    | 0.006048 | 0.00281 |
|      | Previously diagnosed diabetes         | 0.065152    | 0.148826 | 0.66155 |
|      | Suffered with diabetes complications  | 0.176277    | 0.126432 | 0.16324 |
|      | Have family history of diabetes       | -0.023252   | 0.302567 | 0.93874 |
|      | Screening one year prior to diagnosis | 0.182462    | 0.373111 | 0.62482 |
|      | Type II diabetes                      | -0.027722   | 0.392355 | 0.94367 |
|      | Length of stay                        | 0.025196    | 0.005490 | <0.001  |
|      | Suffered with hypertension            | 0.046064    | 0.161325 | 0.77524 |
|      | Reimbursement ratio: 85%              | -0.269021   | 0.189138 | 0.15492 |
|      | Suffered with CHF                     | 0.564368    | 0.286007 | 0.04847 |
| 2010 | Secondary hospitals                   | -0.270094   | 0.156143 | 0.08367 |
|      | Tertiary hospitals                    | -0.712825   | 0.161201 | <0.001  |
|      | Male                                  | -0.107909   | 0.113390 | 0.34127 |
|      | Age                                   | 0.008034    | 0.006398 | 0.20925 |
|      | Previously diagnosed diabetes         | -0.119138   | 0.148147 | 0.42129 |
|      | Suffered with diabetes complications  | 0.292942    | 0.121827 | 0.01619 |
|      | Have family history of diabetes       | 0.283137    | 0.276024 | 0.30500 |
|      | Screening one year prior to diagnosis | -0.287208   | 0.513332 | 0.57582 |

|      | Variables                             | Coefficient | SE*      | p        |
|------|---------------------------------------|-------------|----------|----------|
|      | Type II diabetes                      | 0.147284    | 0.461627 | 0.74969  |
|      | Length of stay                        | 0.019792    | 0.006946 | 0.00438  |
|      | Suffered with hypertension            | 0.568212    | 0.132243 | <0.001   |
|      | Reimbursement ratio: 85%              | -0.163758   | 0.175926 | 0.35194  |
|      | Suffered with CHF                     | -0.064724   | 0.278294 | 0.81609  |
| 2011 |                                       |             |          |          |
|      | Secondary hospitals                   | -0.212739   | 0.158863 | 0.1805   |
|      | Tertiary hospitals                    | -0.785880   | 0.164031 | <0.001   |
|      | Male                                  | -0.054378   | 0.113726 | 0.6325   |
|      | Age                                   | 0.001081    | 0.006370 | 0.8653   |
|      | Previously diagnosed diabetes         | 0.069846    | 0.139355 | 0.6162   |
|      | Suffered with diabetes complications  | 0.060683    | 0.126721 | 0.6320   |
|      | Have family history of diabetes       | 0.367063    | 0.274917 | 0.1818   |
|      | Screening one year prior to diagnosis | -0.548343   | 0.587878 | 0.3509   |
|      | Type II diabetes                      | -0.619184   | 0.317506 | 0.0512   |
|      | Length of stay                        | 0.016834    | 0.009003 | 0.0615   |
|      | Suffered with hypertension            | 0.072371    | 0.113623 | 0.5242   |
|      | Reimbursement ratio: 85%              | -0.359659   | 0.176227 | 0.0413   |
|      | Suffered with CHF                     | -0.108849   | 0.460534 | 0.8132   |
| 2012 |                                       |             |          |          |
|      | Secondary hospitals                   | 0.187631    | 0.182184 | 0.303058 |
|      | Tertiary hospitals                    | -0.380348   | 0.187952 | 0.043006 |
|      | Male                                  | -0.141566   | 0.119222 | 0.235064 |
|      | Age                                   | 0.023282    | 0.006587 | <0.001   |
|      | Previously diagnosed diabetes         | 0.093493    | 0.143330 | 0.514212 |
|      | Suffered with diabetes complications  | 0.373522    | 0.123525 | 0.002496 |
|      | Have family history of diabetes       | 0.368939    | 0.304843 | 0.226179 |
|      | Screening one year prior to diagnosis | 0.036716    | 0.423476 | 0.930909 |
|      | Type II diabetes                      | -0.456006   | 0.321111 | 0.155583 |
|      | Length of stay                        | 0.028019    | 0.007682 | <0.001   |
|      | Suffered with hypertension            | 0.612780    | 0.130387 | <0.001   |
|      | Reimbursement ratio: 85%              | 0.134830    | 0.182071 | 0.458974 |
|      | Suffered with CHF                     | -1.060084   | 1.013634 | 0.295642 |
| 2013 |                                       |             |          |          |
|      | Secondary hospitals                   | -0.216477   | 0.193342 | 0.26286  |
|      | Tertiary hospitals                    | -0.381089   | 0.189600 | 0.04444  |
|      | Male                                  | -0.115878   | 0.120967 | 0.33810  |
|      | Age                                   | 0.001520    | 0.006848 | 0.82430  |
|      | Previously diagnosed diabetes         | 0.101514    | 0.144713 | 0.48300  |
|      | Suffered with diabetes complications  | 0.312456    | 0.127681 | 0.01440  |
|      | Have family history of diabetes       | -0.158894   | 0.364995 | 0.66332  |
|      | Screening one year prior to diagnosis | 0.076602    | 0.394282 | 0.84596  |
|      | Type II diabetes                      | -0.691391   | 0.334339 | 0.03865  |

| Variables                  | Coefficient | SE*      | p       |
|----------------------------|-------------|----------|---------|
| Length of stay             | 0.032338    | 0.008141 | <0.001  |
| Suffered with hypertension | 0.425337    | 0.145370 | 0.00343 |
| Reimbursement ratio: 85%   | -0.555495   | 0.193697 | 0.00413 |
| Suffered with CHF          | 0.203121    | 0.600906 | 0.73534 |

\*SE: Standard error



## The prevalence and long-term variation of hospital readmission for patients with diabetes in Tianjin, China: a cross-sectional study

Xiaoqian Liu

**Table S5 Characteristics of patients and hospitals of discharge for 90-day readmission**

| Variables                             | Coefficient | SE*      | p        |
|---------------------------------------|-------------|----------|----------|
| 2008                                  |             |          |          |
| Secondary hospitals                   | -0.209373   | 0.135731 | 0.1229   |
| Tertiary hospitals                    | -0.538091   | 0.133720 | <0.001   |
| Male                                  | 0.029859    | 0.082313 | 0.7168   |
| Age                                   | 0.003634    | 0.004506 | <0.001   |
| Previously diagnosed diabetes         | -0.025032   | 0.115447 | 0.8283   |
| Suffered with diabetes complications  | 0.127208    | 0.090471 | 0.1597   |
| Have family history of diabetes       | -0.306833   | 0.250618 | 0.2208   |
| Screening one year prior to diagnosis | -0.576104   | 0.329813 | 0.0807   |
| Type II diabetes                      | -0.071466   | 0.227410 | 0.7533   |
| Length of stay                        | 0.004032    | 0.004763 | 0.3973   |
| Suffered with hypertension            | 0.696892    | 0.100575 | <0.001   |
| Reimbursement ratio: 85%              | -0.266847   | 0.134070 | 0.0466   |
| Suffered with CHF                     | -0.508331   | 0.250170 | 0.0422   |
| 2009                                  |             |          |          |
| Secondary hospitals                   | -0.362852   | 0.110106 | <0.001   |
| Tertiary hospitals                    | -0.68451    | 0.109884 | <0.001   |
| Male                                  | -0.08335    | 0.071319 | 0.242532 |
| Age                                   | 0.010853    | 0.003896 | 0.005341 |
| Previously diagnosed diabetes         | -0.127127   | 0.101775 | 0.211626 |
| Suffered with diabetes complications  | 0.136064    | 0.081133 | 0.093533 |
| Have family history of diabetes       | -0.107924   | 0.200282 | 0.589984 |
| Screening one year prior to diagnosis | -0.586635   | 0.346869 | 0.090793 |
| Type II diabetes                      | -0.172122   | 0.232731 | 0.459557 |
| Length of stay                        | 0.015757    | 0.004305 | <0.001   |
| Suffered with hypertension            | 0.640886    | 0.087347 | <0.001   |
| Reimbursement ratio: 85%              | -0.200808   | 0.116282 | 0.084184 |
| Suffered with CHF                     | 0.356321    | 0.173025 | 0.039459 |
| 2010                                  |             |          |          |
| Secondary hospitals                   | -0.079946   | 0.106760 | 0.453953 |
| Tertiary hospitals                    | -0.356107   | 0.107429 | <0.001   |
| Male                                  | -0.077038   | 0.069292 | 0.266234 |
| Age                                   | 0.007953    | 0.003911 | 0.042028 |
| Previously diagnosed diabetes         | 0.062306    | 0.085648 | 0.466938 |
| Suffered with diabetes complications  | 0.052749    | 0.078680 | 0.502589 |
| Have family history of diabetes       | -0.170279   | 0.193845 | 0.379709 |
| Screening one year prior to diagnosis | 0.120523    | 0.236472 | 0.610283 |

|      | Variables                             | Coefficient | SE*      | p        |
|------|---------------------------------------|-------------|----------|----------|
|      | Type II diabetes                      | -0.287412   | 0.236650 | 0.224557 |
|      | Length of stay                        | 0.019179    | 0.004683 | <0.001   |
|      | Suffered with hypertension            | 0.656857    | 0.080317 | <0.001   |
|      | Reimbursement ratio: 85%              | -0.319777   | 0.109935 | 0.003628 |
|      | Suffered with CHF                     | 0.032159    | 0.164171 | 0.844700 |
| 2011 |                                       |             |          |          |
|      | Secondary hospitals                   | -0.232592   | 0.094064 | 0.013409 |
|      | Tertiary hospitals                    | -0.629191   | 0.095081 | <0.001   |
|      | Male                                  | 0.031393    | 0.066228 | 0.635492 |
|      | Age                                   | 0.014764    | 0.003691 | <0.001   |
|      | Previously diagnosed diabetes         | 0.007661    | 0.082558 | 0.926067 |
|      | Suffered with diabetes complications  | 0.245496    | 0.071863 | <0.001   |
|      | Have family history of diabetes       | 0.079219    | 0.178604 | 0.657372 |
|      | Screening one year prior to diagnosis | 0.167519    | 0.234585 | 0.475160 |
|      | Type II diabetes                      | -0.741731   | 0.178404 | <0.001   |
|      | Length of stay                        | 0.018408    | 0.005341 | <0.001   |
|      | Suffered with hypertension            | 0.051257    | 0.066243 | 0.439067 |
|      | Reimbursement ratio: 85%              | -0.032281   | 0.101825 | 0.751226 |
|      | Suffered with CHF                     | -0.108564   | 0.267047 | 0.684350 |
| 2012 |                                       |             |          |          |
|      | Secondary hospitals                   | -0.228197   | 0.102329 | 0.025745 |
|      | Tertiary hospitals                    | -0.457302   | 0.101532 | <0.001   |
|      | Male                                  | 0.007809    | 0.067618 | 0.908059 |
|      | Age                                   | 0.012539    | 0.003767 | <0.001   |
|      | Previously diagnosed diabetes         | 0.142743    | 0.081096 | 0.078377 |
|      | Suffered with diabetes complications  | 0.116350    | 0.074223 | 0.116981 |
|      | Have family history of diabetes       | -0.155601   | 0.209182 | 0.456966 |
|      | Screening one year prior to diagnosis | 0.120605    | 0.208586 | 0.563128 |
|      | Type II diabetes                      | 0.175129    | 0.257144 | 0.495837 |
|      | Length of stay                        | 0.020327    | 0.005538 | <0.001   |
|      | Suffered with hypertension            | 0.845105    | 0.071963 | <0.001   |
|      | Reimbursement ratio: 85%              | -0.078348   | 0.104706 | 0.454296 |
|      | Suffered with CHF                     | 0.157768    | 0.311150 | 0.612122 |
| 2013 |                                       |             |          |          |
|      | Secondary hospitals                   | -0.433890   | 0.094029 | <0.001   |
|      | Tertiary hospitals                    | -0.879127   | 0.094076 | <0.001   |
|      | Male                                  | -0.161519   | 0.064730 | 0.01259  |
|      | Age                                   | 0.011216    | 0.003648 | 0.00211  |
|      | Previously diagnosed diabetes         | -0.089348   | 0.081552 | 0.27326  |
|      | Suffered with diabetes complications  | 0.172583    | 0.068882 | 0.01223  |
|      | Have family history of diabetes       | -0.207744   | 0.200003 | 0.29894  |
|      | Screening one year prior to diagnosis | 0.489085    | 0.186420 | 0.00870  |
|      | Type II diabetes                      | -0.450888   | 0.202286 | 0.02582  |

| Variables                  | Coefficient | SE*      | p       |
|----------------------------|-------------|----------|---------|
| Length of stay             | 0.029470    | 0.005393 | <0.001  |
| Suffered with hypertension | 0.570314    | 0.074756 | <0.001  |
| Reimbursement ratio: 85%   | -0.238530   | 0.099755 | 0.01679 |
| Suffered with CHF          | -0.231679   | 0.381505 | 0.54367 |

\*SE: Standard error
